# Supplementary material for: Kinetic and thermodynamic studies of HMF-ester synthesis using Brønsted–Lewis acidic ionic liquid catalyst
Source: Royal Society of Chemistry journal article supplement (doi:10.1039/d2su00058j), 2023-01-01
Supplement: d2su00058j1.pdf [file d2su00058j1.pdf]

Supporting Information

**Kinetics and thermodynamic studies of HMF-esters synthesis using Brønsted-Lewis acidic ionic liquid catalyst**

Komal Kumar, Shailesh Pathak, Amit Kumar Rajora, Anthony Halog<sup>\*a</sup> and Sreedevi Upadhyayula<sup>\*b</sup>

<sup>a</sup>School of Earth and Environmental Sciences, The University of Queensland, Brisbane , Australia. Tel. No: +61 7 336 56141, E-mail id: [a.halog@uq.edu.au](mailto:a.halog@uq.edu.au)

<sup>b</sup>Department of Chemical Engineering, Indian Institute of Technology Delhi, Hauz Khas, New Delhi-110016, India.

\*Corresponding author. Tel. No: +91 11 26591083, Fax: +91 11 26591120, E-mail id: [sreedevi@chemical.iitd.ac.in](mailto:sreedevi@chemical.iitd.ac.in)

**Table S1.** Comparison of the thermodynamic properties of 5-HMF obtained by the different group contribution methods.

| Compound | Parameters            | Experimental       | Estimated by methods |                    |                    |                    |
|----------|-----------------------|--------------------|----------------------|--------------------|--------------------|--------------------|
|          |                       |                    | JOBACK               | GANI               | AMBROSE            | LYDERSON           |
| 5-HMF    | $T_c (k)$             | 794.90             | 761.61               | 712.35             | 833.89             | 758.47             |
|          | Error                 |                    | 4.18                 | 10.38              | 4.90               | 4.58               |
|          | $P_c (bar)$           | $4.95 \times 10^6$ | $5.23 \times 10^6$   | $4.30 \times 10^6$ | $5.29 \times 10^6$ | $4.45 \times 10^6$ |
|          | Error                 |                    | 5.77                 | 13.05              | 7.00               | 9.93               |
|          | $V_c (m^3 kmol^{-1})$ | 0.33               | 0.34                 | 0.39               | 0.32               | 0.34               |
|          | Error                 |                    | 2.54                 | 15.90              | 3.26               | 1.80               |

**Table S2.** Calculated value of ideal gas heat capacity  $C_p (Jmol^{-1}K^{-1})$  for 5-HMF at constant pressure using JOBACK method.

| Property | 100 | 200 | 300 | 400 | 500 | 600 | 700 | 800 | 900 | 1000 |
|----------|-----|-----|-----|-----|-----|-----|-----|-----|-----|------|
|----------|-----|-----|-----|-----|-----|-----|-----|-----|-----|------|

|                    |            |            |            |            |             |             |            |            |            |            |
|--------------------|------------|------------|------------|------------|-------------|-------------|------------|------------|------------|------------|
| $CP^0$             | 161.7<br>7 | 198.7<br>1 | 228.6<br>8 | 251.8<br>8 | 270.1<br>89 | 285.4<br>13 | 298.8<br>1 | 311.1<br>2 | 322.7<br>2 | 333.7<br>3 |
| <b>CP</b>          | 155.8<br>8 | 183.6<br>2 | 204.9<br>8 | 223.4<br>9 | 238.6<br>5  | 250.9<br>7  | 260.9<br>7 | 269.1<br>6 | 276.0<br>6 | 282.1<br>7 |
| <b>%<br/>error</b> | 3.64       | 7.59       | 10.36      | 11.26      | 11.67       | 12.07       | 12.66      | 13.49      | 14.46      | 15.45      |

**Table S3.** Calculated value of ideal gas heat capacity  $C_p$  ( $Jmol^{-1}K^{-1}$ ) for 5-HMF at constant pressure using BENSON method.

| <b>Prop<br/>erty</b> | <b>100</b>  | <b>200</b> | <b>300</b> | <b>400</b> | <b>500</b> | <b>600</b> | <b>700</b> | <b>800</b> | <b>900</b> | <b>1000</b> |
|----------------------|-------------|------------|------------|------------|------------|------------|------------|------------|------------|-------------|
| $CP^0$               | 161.7<br>7  | 198.7<br>0 | 228.6<br>8 | 251.8<br>8 | 270.1<br>9 | 285.4<br>1 | 260.9<br>7 | 269.1<br>6 | 276.0<br>6 | 282.1<br>7  |
| <b>CP</b>            | 163.0<br>27 | 191.7<br>0 | 215.2<br>8 | 234.5<br>3 | 250.2<br>1 | 263.0<br>6 | 273.8<br>5 | 283.3<br>4 | 292.2<br>6 | 301.4<br>0  |
| <b>%<br/>error</b>   | 0.778       | 3.52       | 5.86       | 6.88       | 7.39       | 7.83       | 8.35       | 8.93       | 9.44       | 9.51        |
